# Supplementary material for: Residual cells and nutrient availability guide wound healing in bacterial biofilms
Source: Royal Society of Chemistry journal article supplement (doi:10.1039/d3sm01032e), 2023-12-22
Supplement: d3sm01032e1.xlsx [file d3sm01032e1.xlsx]

## Sheet: all data
Berechnung		Zahl beads	=	Zahl Zellen
		Referenzbeads [Beads/mL]		x
		x [Zellen/mL]	=	Zahl Zellen * Referenzbeads * Volumen beads * Verdünnungsfaktor
				Zahl beads * Volumen Zellen
1 µm YG counting beads:		34800000	/ mL (23.11.2020, CyFlow, nur Einzelbeads)
Samples		sample name	dilution factor	volume beads	volume bacteria	1 µm YG PMT3 PMT5	cells FSC PMT3	cell gate PMT3 PMT5	cell gate PMT3 PMT5	cell gate PMT3 PMT5	cell count total cells	cell count vegetative cells	cell counts spores	cell counts dead cells	total counts (cell gate incl. dead cells)	cell count VEGETATIVE CELLS	cell count SPORES	cell count DEAD CELLS	cell count INACTIVE CELLS (incl. dead cells + spores)	proportion VEGETATIVE CELLS [%]	proportion SPORES [%]	proportion DEAD CELLS [%]	proportion INACTIVE CELLS (incl. spores + dead cells) [%]
		H=healed=wound N=normal		1 µm YG [µl]	[µl]	Gate 1 µm YG beads	cell gate	vegetative cells	spores	dead cells	[ZZ/mL]													Measuring Protocol	Counting Protocol (FlowJo)
20230315_	14	agar_H_24h_1	0.428571	7	510	379	49752	41737	4624	3382	2.68721e+07	2.2543e+07	2.49752e+06	1.82669e+06	2.68721e+07	2.2543e+07	2.49752e+06	1.82669e+06	4.32421e+06	83.8901	9.2941	6.79772	16.0918	PI_SYTO9_2303_gates_TeamZ	B-sub3610_20230315-17_PI-Syto9_MNAR
20230315_	16	agar_H_24h_2	0.857143	7	510	155	50284	45113	3987	1300	1.32818e+08	1.1916e+08	1.05311e+07	3.43378e+06	1.32818e+08	1.1916e+08	1.05311e+07	3.43378e+06	1.39649e+07	89.7164	7.92896	2.58532	10.5143	PI_SYTO9_2303_gates_TeamZ	B-sub3610_20230315-17_PI-Syto9_MNAR
20230315_	18	agar_H_24h_3	1	7	510	498	50185	44260	4201	1771	4.8134e+07	4.24511e+07	4.02931e+06	1.69862e+06	4.8134e+07	4.24511e+07	4.02931e+06	1.69862e+06	5.72793e+06	88.1937	8.37103	3.52894	11.9	PI_SYTO9_2303_gates_TeamZ	B-sub3610_20230315-17_PI-Syto9_MNAR
20230316_	7	agar_H_48h_1	2.28571	7	510	179	51195	47871	1341	1757	3.12251e+08	2.91977e+08	8.17909e+06	1.07164e+07	3.12251e+08	2.91977e+08	8.17909e+06	1.07164e+07	1.88955e+07	93.5072	2.6194	3.43198	6.05137	PI_SYTO9_2303_gates_TeamZ	B-sub3610_20230315-17_PI-Syto9_MNAR
20230316_	11	agar_H_48h_2	6.85714	7	510	461	49368	44237	2894	2087	3.50748e+08	3.14293e+08	2.05612e+07	1.48276e+07	3.50748e+08	3.14293e+08	2.05612e+07	1.48276e+07	3.53888e+07	89.6066	5.8621	4.22743	10.0895	PI_SYTO9_2303_gates_TeamZ	B-sub3610_20230315-17_PI-Syto9_MNAR
20230316_	15	agar_H_48h_3	3.85714	7	510	450	50057	46388	1470	2075	2.04939e+08	1.89918e+08	6.01835e+06	8.49529e+06	2.04939e+08	1.89918e+08	6.01835e+06	8.49529e+06	1.45136e+07	92.6704	2.93665	4.14527	7.08193	PI_SYTO9_2303_gates_TeamZ	B-sub3610_20230315-17_PI-Syto9_MNAR
23030317_	7	agar_H_72h_1	4	7	510	478	51181	34082	15670	1223	2.04573e+08	1.36227e+08	6.26337e+07	4.88839e+06	2.04573e+08	1.36227e+08	6.26337e+07	4.88839e+06	6.75221e+07	66.5911	30.6168	2.38956	33.0064	PI_SYTO9_2303_gates_TeamZ	B-sub3610_20230315-17_PI-Syto9_MNAR
23030317_	11	agar_H_72h_2	1.85714	7	510	566	51836	40890	8906	1709	8.12395e+07	6.40845e+07	1.39579e+07	2.67842e+06	8.12395e+07	6.40845e+07	1.39579e+07	2.67842e+06	1.66363e+07	78.8834	17.1811	3.29694	20.478	PI_SYTO9_2303_gates_TeamZ	B-sub3610_20230315-17_PI-Syto9_MNAR
23030317_	15	agar_H_72h_3	10	7	510	480	50516	36624	12231	1530	5.02684e+08	3.64445e+08	1.2171e+08	1.5225e+07	5.02684e+08	3.64445e+08	1.2171e+08	1.5225e+07	1.36935e+08	72.4998	24.2121	3.02874	27.2409	PI_SYTO9_2303_gates_TeamZ	B-sub3610_20230315-17_PI-Syto9_MNAR
20230316_	19	agar_N_24h_1	0.714286	7	510	706	50519	46404	1487	2418	2.44134e+07	2.24249e+07	718597	1.16851e+06	2.44134e+07	2.24249e+07	718597	1.16851e+06	1.8871e+06	91.8545	2.94345	4.78632	7.72977	PI_SYTO9_2303_gates_TeamZ	B-sub3610_20230315-17_PI-Syto9_MNAR
20230316_	21	agar_N_24h_2	2	7	510	2823	17574	14842	1067	1011	5.94699e+06	5.02249e+06	361069	342119	5.94699e+06	5.02249e+06	361069	342119	703189	84.4543	6.07147	5.75282	11.8243	PI_SYTO9_2303_gates_TeamZ	B-sub3610_20230315-17_PI-Syto9_MNAR
20230316_	23	agar_N_24h_3	0.857143	7	510	882	50951	45975	1743	2820	2.36507e+07	2.13409e+07	809076	1.309e+06	2.36507e+07	2.13409e+07	809076	1.309e+06	2.11808e+06	90.2338	3.42093	5.53473	8.95566	PI_SYTO9_2303_gates_TeamZ	B-sub3610_20230315-17_PI-Syto9_MNAR
20230315_	15	agar_N_48h_1	1	7	510	713	50714	41632	5749	3102	3.39739e+07	2.78898e+07	3.85132e+06	2.07807e+06	3.39739e+07	2.78898e+07	3.85132e+06	2.07807e+06	5.92939e+06	82.0917	11.3361	6.11665	17.4528	PI_SYTO9_2303_gates_TeamZ	B-sub3610_20230315-17_PI-Syto9_MNAR
20230315_	17	agar_N_48h_2	0.285714	7	510	162	50425	46176	3202	1314	4.24786e+07	3.88992e+07	2.6974e+06	1.10693e+06	4.24786e+07	3.88992e+07	2.6974e+06	1.10693e+06	3.80433e+06	91.5736	6.35002	2.60585	8.95588	PI_SYTO9_2303_gates_TeamZ	B-sub3610_20230315-17_PI-Syto9_MNAR
20230315_	19	agar_N_48h_3	1.28571	7	510	109	50965	47850	1828	965	2.87142e+08	2.69592e+08	1.02991e+07	5.43691e+06	2.87142e+08	2.69592e+08	1.02991e+07	5.43691e+06	1.57361e+07	93.888	3.58678	1.89346	5.48023	PI_SYTO9_2303_gates_TeamZ	B-sub3610_20230315-17_PI-Syto9_MNAR
20230316_	9	agar_N_72h_1	4.14286	7	510	496	50799	46580	2763	1301	2.02666e+08	1.85834e+08	1.10232e+07	5.19042e+06	2.02666e+08	1.85834e+08	1.10232e+07	5.19042e+06	1.62136e+07	91.6947	5.43908	2.56107	8.00016	PI_SYTO9_2303_gates_TeamZ	B-sub3610_20230315-17_PI-Syto9_MNAR
20230316_	13	agar_N_72h_2	3.57143	7	510	1118	50213	45714	2117	2097	7.66167e+07	6.9752e+07	3.23019e+06	3.19967e+06	7.66167e+07	6.9752e+07	3.23019e+06	3.19967e+06	6.42986e+06	91.0402	4.21604	4.17621	8.39225	PI_SYTO9_2303_gates_TeamZ	B-sub3610_20230315-17_PI-Syto9_MNAR
20230316_	17	agar_N_72h_3	2.85714	7	510	468	51493	44410	1972	4927	1.50156e+08	1.29501e+08	5.75043e+06	1.43673e+07	1.50156e+08	1.29501e+08	5.75043e+06	1.43673e+07	2.01177e+07	86.2447	3.82965	9.56829	13.3979	PI_SYTO9_2303_gates_TeamZ	B-sub3610_20230315-17_PI-Syto9_MNAR
23030317_	9	agar_N_96h_1	3.28571	7	510	412	50485	42818	5452	2093	1.9231e+08	1.63105e+08	2.0768e+07	7.97276e+06	1.9231e+08	1.63105e+08	2.0768e+07	7.97276e+06	2.87408e+07	84.8133	10.7992	4.14579	14.945	PI_SYTO9_2303_gates_TeamZ	B-sub3610_20230315-17_PI-Syto9_MNAR
23030317_	13	agar_N_96h_2	11.4286	7	510	3084	51085	41912	6672	2037	9.04228e+07	7.41862e+07	1.18098e+07	3.60558e+06	9.04228e+07	7.41862e+07	1.18098e+07	3.60558e+06	1.54153e+07	82.0437	13.0606	3.98747	17.0481	PI_SYTO9_2303_gates_TeamZ	B-sub3610_20230315-17_PI-Syto9_MNAR
23030317_	17	agar_N_96h_3	6.85714	7	510	450	50602	38082	10570	1715	3.68303e+08	2.77177e+08	7.6933e+07	1.24825e+07	3.68303e+08	2.77177e+08	7.6933e+07	1.24825e+07	8.94155e+07	75.2579	20.8885	3.38919	24.2777	PI_SYTO9_2303_gates_TeamZ	B-sub3610_20230315-17_PI-Syto9_MNAR
20230315_	30	colony_H_24h_1	11.5714	7	510	414	50426	43176	6172	979	6.73206e+08	5.76416e+08	8.23986e+07	1.307e+07	6.73206e+08	5.76416e+08	8.23986e+07	1.307e+07	9.54686e+07	85.6225	12.2397	1.94146	14.1812	PI_SYTO9_2303_gates_TeamZ	B-sub3610_20230315-17_PI-Syto9_MNAR
20230315_	32	colony_H_24h_2	12.1429	7	510	493	50627	41046	8804	711	5.95612e+08	4.82894e+08	1.03576e+08	8.36471e+06	5.95612e+08	4.82894e+08	1.03576e+08	8.36471e+06	1.11941e+08	81.0753	17.3899	1.40439	18.7943	PI_SYTO9_2303_gates_TeamZ	B-sub3610_20230315-17_PI-Syto9_MNAR
20230315_	34	colony_H_24h_3	14.7143	7	510	348	50309	42808	6251	1156	1.01604e+09	8.64554e+08	1.26246e+08	2.33467e+07	1.01604e+09	8.64554e+08	1.26246e+08	2.33467e+07	1.49592e+08	85.0901	12.4252	2.2978	14.723	PI_SYTO9_2303_gates_TeamZ	B-sub3610_20230315-17_PI-Syto9_MNAR
20230316_	6	colony_H_48h_1	44.4286	7	510	455	49797	41473	6079	1994	2.32253e+09	1.9343e+09	2.83524e+08	9.30001e+07	2.32253e+09	1.9343e+09	2.83524e+08	9.30001e+07	3.76524e+08	83.2841	12.2076	4.00426	16.2118	PI_SYTO9_2303_gates_TeamZ	B-sub3610_20230315-17_PI-Syto9_MNAR
20230316_	10	colony_H_48h_2	45	7	510	452	49796	39015	8800	1822	2.36797e+09	1.85529e+09	4.1847e+08	8.66422e+07	2.36797e+09	1.85529e+09	4.1847e+08	8.66422e+07	5.05112e+08	78.3497	17.6721	3.65893	21.331	PI_SYTO9_2303_gates_TeamZ	B-sub3610_20230315-17_PI-Syto9_MNAR
20230316_	14	colony_H_48h_3	51.8571	7	510	467	49971	41396	6448	1872	2.65043e+09	2.19562e+09	3.41998e+08	9.92898e+07	2.65043e+09	2.19562e+09	3.41998e+08	9.92898e+07	4.41288e+08	82.84	12.9035	3.74617	16.6497	PI_SYTO9_2303_gates_TeamZ	B-sub3610_20230315-17_PI-Syto9_MNAR
23030317_	6	colony_H_72h_1	64.2857	7	510	418	50173	37033	11745	1136	3.68566e+09	2.72041e+09	8.62777e+08	8.34495e+07	3.68566e+09	2.72041e+09	8.62777e+08	8.34495e+07	9.46226e+08	73.8106	23.409	2.26417	25.6732	PI_SYTO9_2303_gates_TeamZ	B-sub3610_20230315-17_PI-Syto9_MNAR
23030317_	10	colony_H_72h_2	67	7	510	495	50253	35325	13733	980	3.24892e+09	2.2838e+09	8.87855e+08	6.33582e+07	3.24892e+09	2.2838e+09	8.87855e+08	6.33582e+07	9.51213e+08	70.2943	27.3277	1.95013	29.2779	PI_SYTO9_2303_gates_TeamZ	B-sub3610_20230315-17_PI-Syto9_MNAR
23030317_	14	colony_H_72h_3	55.2857	7	510	468	50212	38238	10347	1431	2.83323e+09	2.15759e+09	5.83833e+08	8.07447e+07	2.83323e+09	2.15759e+09	5.83833e+08	8.07447e+07	6.64578e+08	76.1531	20.6066	2.84992	23.4565	PI_SYTO9_2303_gates_TeamZ	B-sub3610_20230315-17_PI-Syto9_MNAR
20230316_	18	colony_N_24h_1	7.28571	7	510	866	51186	45783	2770	2412	2.0569e+08	1.83978e+08	1.11312e+07	9.69256e+06	2.0569e+08	1.83978e+08	1.11312e+07	9.69256e+06	2.08237e+07	89.4444	5.41164	4.71223	10.1239	PI_SYTO9_2303_gates_TeamZ	B-sub3610_20230315-17_PI-Syto9_MNAR
20230316_	20	colony_N_24h_2	6.42857	7	510	442	50278	46131	1702	2307	3.49283e+08	3.20474e+08	1.18238e+07	1.60268e+07	3.49283e+08	3.20474e+08	1.18238e+07	1.60268e+07	2.78507e+07	91.7519	3.38518	4.58849	7.97367	PI_SYTO9_2303_gates_TeamZ	B-sub3610_20230315-17_PI-Syto9_MNAR
20230316_	22	colony_N_24h_3	5.14286	7	510	599	50647	45943	2322	2179	2.07701e+08	1.8841e+08	9.52241e+06	8.93598e+06	2.07701e+08	1.8841e+08	9.52241e+06	8.93598e+06	1.84584e+07	90.7122	4.58467	4.30233	8.887	PI_SYTO9_2303_gates_TeamZ	B-sub3610_20230315-17_PI-Syto9_MNAR
20230315_	31	colony_N_48h_1	24	7	510	342	49591	45533	2364	1594	1.66225e+09	1.52622e+09	7.92391e+07	5.34294e+07	1.66225e+09	1.52622e+09	7.92391e+07	5.34294e+07	1.32669e+08	91.8171	4.76699	3.21429	7.98129	PI_SYTO9_2303_gates_TeamZ	B-sub3610_20230315-17_PI-Syto9_MNAR
20230315_	33	colony_N_48h_2	21.8571	7	510	334	49801	42853	5423	1397	1.55665e+09	1.33948e+09	1.69509e+08	4.36667e+07	1.55665e+09	1.33948e+09	1.69509e+08	4.36667e+07	2.13176e+08	86.0485	10.8893	2.80516	13.6945	PI_SYTO9_2303_gates_TeamZ	B-sub3610_20230315-17_PI-Syto9_MNAR
20230315_	35	colony_N_48h_3	24.8571	7	510	355	49562	43136	4387	1958	1.6576e+09	1.44268e+09	1.46723e+08	6.54851e+07	1.6576e+09	1.44268e+09	1.46723e+08	6.54851e+07	2.12208e+08	87.0344	8.85154	3.95061	12.8021	PI_SYTO9_2303_gates_TeamZ	B-sub3610_20230315-17_PI-Syto9_MNAR
20230316_	8	colony_N_72h_1	47.7143	7	510	399	49829	42691	4558	2329	2.8462e+09	2.43848e+09	2.6035e+08	1.33031e+08	2.8462e+09	2.43848e+09	2.6035e+08	1.33031e+08	3.9338e+08	85.675	9.14728	4.67399	13.8213	PI_SYTO9_2303_gates_TeamZ	B-sub3610_20230315-17_PI-Syto9_MNAR
20230316_	12	colony_N_72h_2	54.2857	7	510	424	49808	42367	5254	1986	3.04597e+09	2.59092e+09	3.21305e+08	1.21452e+08	3.04597e+09	2.59092e+09	3.21305e+08	1.21452e+08	4.42757e+08	85.0606	10.5485	3.98731	14.5358	PI_SYTO9_2303_gates_TeamZ	B-sub3610_20230315-17_PI-Syto9_MNAR
20230316_	16	colony_N_72h_3	65.4286	7	510	479	49833	42719	4687	2259	3.25129e+09	2.78715e+09	3.05798e+08	1.47386e+08	3.25129e+09	2.78715e+09	3.05798e+08	1.47386e+08	4.53183e+08	85.7243	9.40541	4.53314	13.9386	PI_SYTO9_2303_gates_TeamZ	B-sub3610_20230315-17_PI-Syto9_MNAR
23030317_	8	colony_N_96h_1	63	7	510	350	49890	41954	5261	2391	4.28937e+09	3.60706e+09	4.52322e+08	2.0557e+08	4.28937e+09	3.60706e+09	4.52322e+08	2.0557e+08	6.57892e+08	84.093	10.5452	4.79254	15.3377	PI_SYTO9_2303_gates_TeamZ	B-sub3610_20230315-17_PI-Syto9_MNAR
23030317_	12	colony_N_96h_2	54.2857	7	510	408	50247	38790	9593	1643	3.19332e+09	2.4652e+09	6.09659e+08	1.04417e+08	3.19332e+09	2.4652e+09	6.09659e+08	1.04417e+08	7.14076e+08	77.1986	19.0917	3.26985	22.3615	PI_SYTO9_2303_gates_TeamZ	B-sub3610_20230315-17_PI-Syto9_MNAR
23030317_	16	colony_N_96h_3	58.4286	7	510	434	50247	37783	10740	1512	3.23112e+09	2.42962e+09	6.90632e+08	9.72287e+07	3.23112e+09	2.42962e+09	6.90632e+08	9.72287e+07	7.87861e+08	75.1945	21.3744	3.00913	24.3835	PI_SYTO9_2303_gates_TeamZ	B-sub3610_20230315-17_PI-Syto9_MNAR

## Sheet: cell number vs time
cell numbe vs. time
			time (h)	Average ZZ Agar H	stdv	st error	Average ZZ Agar N	stdv	st error									#NAME?
agar_H_24h_1	2.2543e+07		24	6.13847e+07	5.10154e+07	2.94537e+07	1.62628e+07	9.74944e+06	5.62884e+06
agar_H_24h_2	1.1916e+08
agar_H_24h_3	4.24511e+07
agar_H_48h_1	2.91977e+08		48	2.65396e+08	6.63115e+07	3.8285e+07	1.12127e+08	1.3648e+08	7.87966e+07
agar_H_48h_2	3.14293e+08
agar_H_48h_3	1.89918e+08
agar_H_72h_1	1.36227e+08		72	1.88252e+08	1.56793e+08	9.05244e+07	1.28362e+08	5.80493e+07	3.35148e+07
agar_H_72h_2	6.40845e+07
agar_H_72h_3	3.64445e+08
agar_N_24h_1	2.24249e+07		96				1.71489e+08	1.01755e+08	5.87482e+07
agar_N_24h_2	5.02249e+06
agar_N_24h_3	2.13409e+07
agar_N_48h_1	2.78898e+07
agar_N_48h_2	3.88992e+07
agar_N_48h_3	2.69592e+08
agar_N_72h_1	1.85834e+08
agar_N_72h_2	6.9752e+07
agar_N_72h_3	1.29501e+08
agar_N_96h_1	1.63105e+08
agar_N_96h_2	7.41862e+07
agar_N_96h_3	2.77177e+08
			time (h)	Average ZZ Colony H	stdv	st error	Average ZZ Colony N	stdv	st error
colony_H_24h_1	5.76416e+08		24	6.41288e+08	1.98928e+08	1.14851e+08	2.30954e+08	7.7558e+07	4.47781e+07
colony_H_24h_2	4.82894e+08
colony_H_24h_3	8.64554e+08
colony_H_48h_1	1.9343e+09		48	1.99507e+09	1.78116e+08	1.02835e+08	1.43613e+09	9.35462e+07	5.40089e+07
colony_H_48h_2	1.85529e+09
colony_H_48h_3	2.19562e+09
colony_H_72h_1	2.72041e+09		72	2.38727e+09	2.95329e+08	1.70508e+08	2.60552e+09	1.74792e+08	1.00916e+08
colony_H_72h_2	2.2838e+09
colony_H_72h_3	2.15759e+09
colony_N_24h_1	1.83978e+08		96				2.83396e+09	6.69757e+08	3.86685e+08
colony_N_24h_2	3.20474e+08
colony_N_24h_3	1.8841e+08
colony_N_48h_1	1.52622e+09
colony_N_48h_2	1.33948e+09
colony_N_48h_3	1.44268e+09
colony_N_72h_1	2.43848e+09
colony_N_72h_2	2.59092e+09
colony_N_72h_3	2.78715e+09
colony_N_96h_1	3.60706e+09
colony_N_96h_2	2.4652e+09
colony_N_96h_3	2.42962e+09
% agar to colony
% agar to colony_H_24h_1	3.9109
% agar to colony_H_24h_2	24.6762
% agar to colony_H_24h_3	4.91018
% agar to colony_H_48h_1	15.0947
% agar to colony_H_48h_2	16.9403
% agar to colony_H_48h_3	8.64985
% agar to colony_H_72h_1	5.00761
% agar to colony_H_72h_2	2.80604
% agar to colony_H_72h_3	16.8913
% agar to colony_N_24h_1	12.1889
% agar to colony_N_24h_2	1.56721
% agar to colony_N_24h_3	11.3269
% agar to colony_N_48h_1	1.82737
% agar to colony_N_48h_2	2.90406
% agar to colony_N_48h_3	18.6869
% agar to colony_N_72h_1	7.62089
% agar to colony_N_72h_2	2.69217
% agar to colony_N_72h_3	4.64637
% agar to colony_N_96h_1	4.52182
% agar to colony_N_96h_2	3.00934
% agar to colony_N_96h_3	11.4082
average	8.63272

## Sheet: Raw Data
Sample:	1µm YG-beads | Count	cell gate | Count	cell gate/vegetative cells | Count	cell gate/spores | Count	cell gate/dead cells | Count
agar_H_24h_1.fcs	379	49752	41737	4624	3382
agar_H_24h_2.fcs	155	50284	45113	3987	1300
agar_H_24h_3.fcs	498	50185	44260	4201	1771
agar_H_48h_1.fcs	179	51195	47871	1341	1757
agar_H_48h_2.fcs	461	49368	44237	2894	2087
agar_H_48h_3.fcs	450	50057	46388	1470	2075
agar_H_72h_1.fcs	478	51181	34082	15670	1223
agar_H_72h_2.fcs	566	51836	40890	8906	1709
agar_H_72h_3.fcs	480	50516	36624	12231	1530
agar_N_24h_1.fcs	706	50519	46404	1487	2418
agar_N_24h_2.fcs	2823	17574	14842	1067	1011
agar_N_24h_3.fcs	882	50951	45975	1743	2820
agar_N_48h_1.fcs	713	50714	41632	5749	3102
agar_N_48h_2.fcs	162	50425	46176	3202	1314
agar_N_48h_3.fcs	109	50965	47850	1828	965
agar_N_72h_1.fcs	496	50799	46580	2763	1301
agar_N_72h_2.fcs	1118	50213	45714	2117	2097
agar_N_72h_3.fcs	468	51493	44410	1972	4927
agar_N_96h_1.fcs	412	50485	42818	5452	2093
agar_N_96h_2.fcs	3084	51085	41912	6672	2037
agar_N_96h_3.fcs	450	50602	38082	10570	1715
colony_H_24h_1.fcs	414	50426	43176	6172	979
colony_H_24h_2.fcs	493	50627	41046	8804	711
colony_H_24h_3.fcs	348	50309	42808	6251	1156
colony_H_48h_1.fcs	455	49797	41473	6079	1994
colony_H_48h_2.fcs	452	49796	39015	8800	1822
colony_H_48h_3.fcs	467	49971	41396	6448	1872
colony_H_72h_1.fcs	418	50173	37033	11745	1136
colony_H_72h_2.fcs	495	50253	35325	13733	980
colony_H_72h_3.fcs	468	50212	38238	10347	1431
colony_N_24h_1.fcs	866	51186	45783	2770	2412
colony_N_24h_2.fcs	442	50278	46131	1702	2307
colony_N_24h_3.fcs	599	50647	45943	2322	2179
colony_N_48h_1.fcs	342	49591	45533	2364	1594
colony_N_48h_2.fcs	334	49801	42853	5423	1397
colony_N_48h_3.fcs	355	49562	43136	4387	1958
colony_N_72h_1.fcs	399	49829	42691	4558	2329
colony_N_72h_2.fcs	424	49808	42367	5254	1986
colony_N_72h_3.fcs	479	49833	42719	4687	2259
colony_N_96h_1.fcs	350	49890	41954	5261	2391
colony_N_96h_2.fcs	408	50247	38790	9593	1643
colony_N_96h_3.fcs	434	50247	37783	10740	1512
