# Supplementary material for: Residual cells and nutrient availability guide wound healing in bacterial biofilms
Source: Royal Society of Chemistry journal article supplement (doi:10.1039/d3sm01032e), 2023-12-22
Supplement: d3sm01032e14.pdf [file d3sm01032e14.pdf]

MovieS1. Movie showing simulations of the biofilm growth in normal conditions.

MovieS2. Movie showing simulations of biofilm recovery after 1/4 biofilm cut at  $t=24$  h of normal growth.

MovieS3. Movie showing simulations of biofilm recovery after 1/4 biofilm cut at  $t=24$  h of normal growth with a small fraction of residual (phantom) cells in the area of the cut.

MovieS4. Movie showing simulations of biofilm recovery after 1/2 biofilm cut at  $t=24$  h of normal growth with a small fraction of residual (phantom) cells in the area of the cut.

MovieS5. Movie showing simulations of biofilm recovery after 1/2 biofilm cut at  $t=24$  h of normal growth accompanied by a refresh of nutrients at the same time and no residual cells in the wound.
