# Supplementary figures and images for: Residual cells and nutrient availability guide wound healing in bacterial biofilms
Source: Royal Society of Chemistry journal article supplement (doi:10.1039/d3sm01032e), 2023-12-22

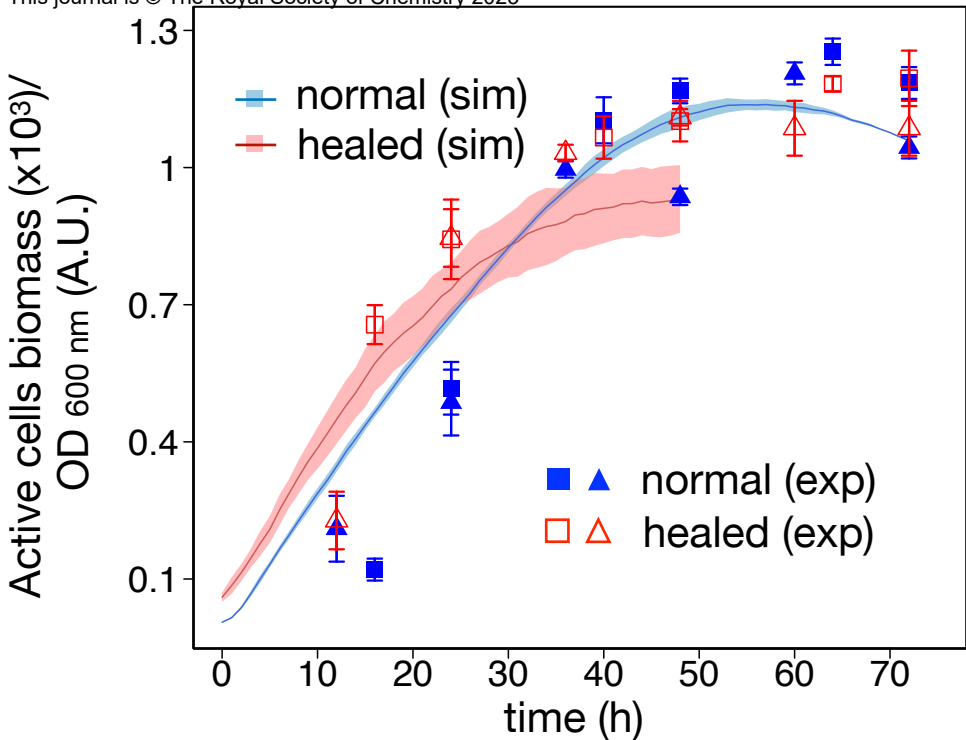

Supplement: d3sm01032e4.pdf [file d3sm01032e4.pdf]

Matrix biomass / Active cells

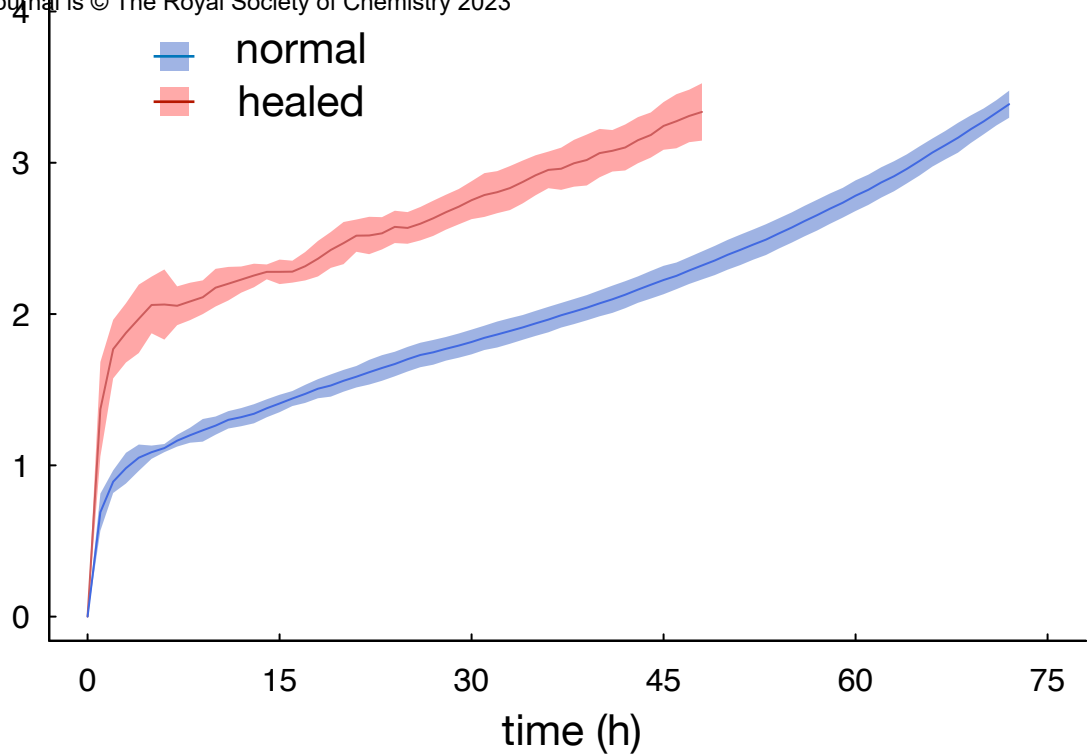

Supplement: d3sm01032e5.pdf [file d3sm01032e5.pdf]

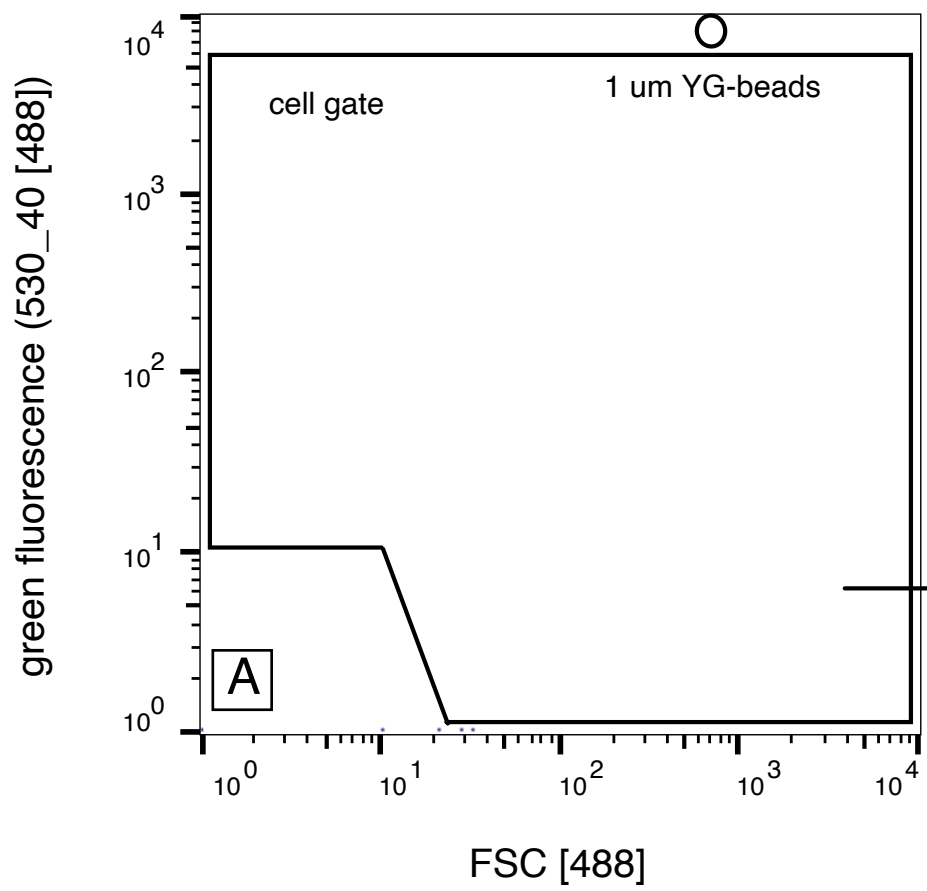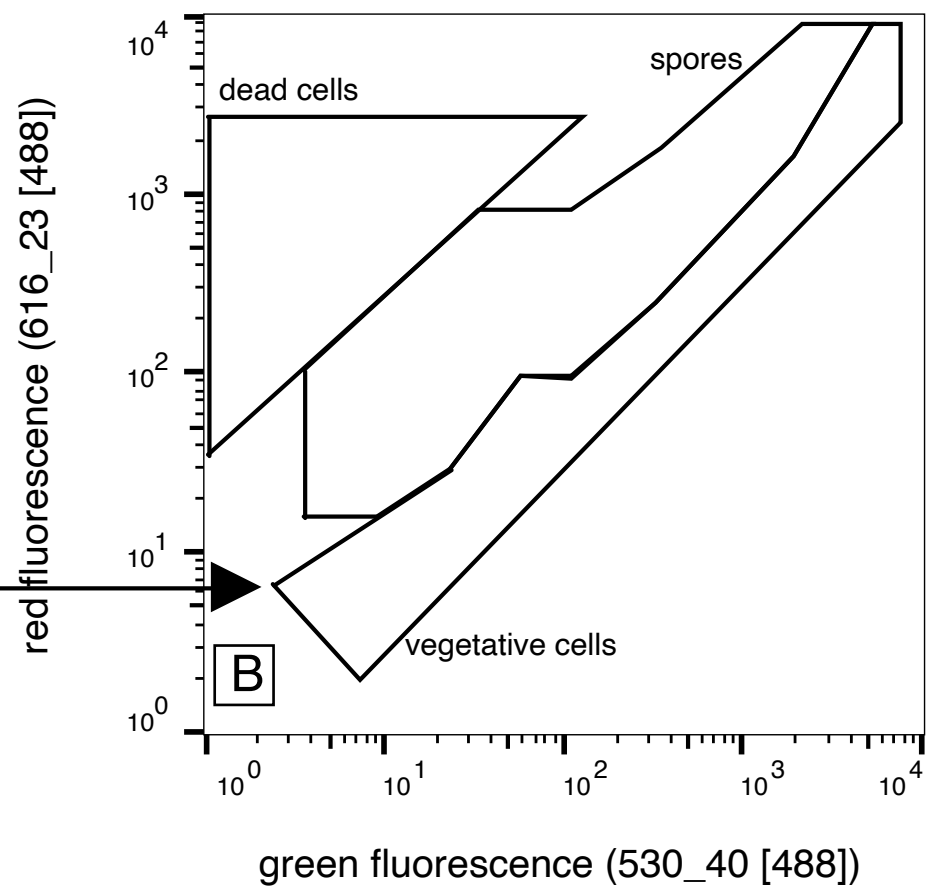

colony\_N\_24h\_1.fcs

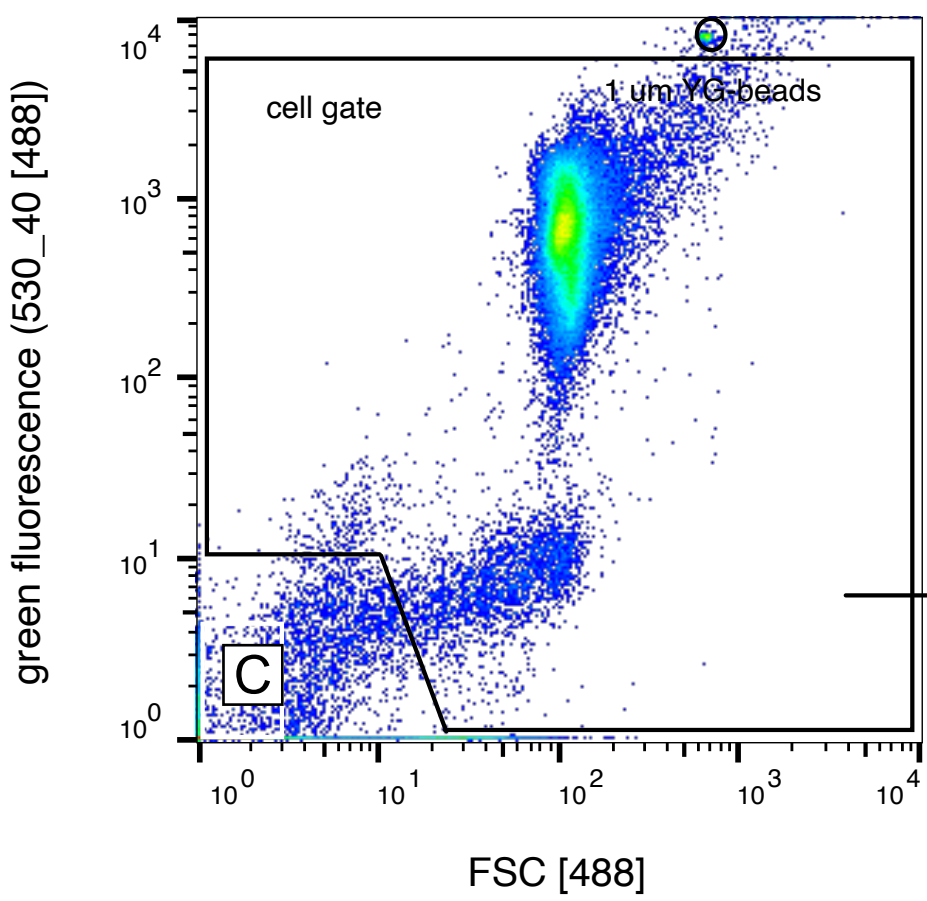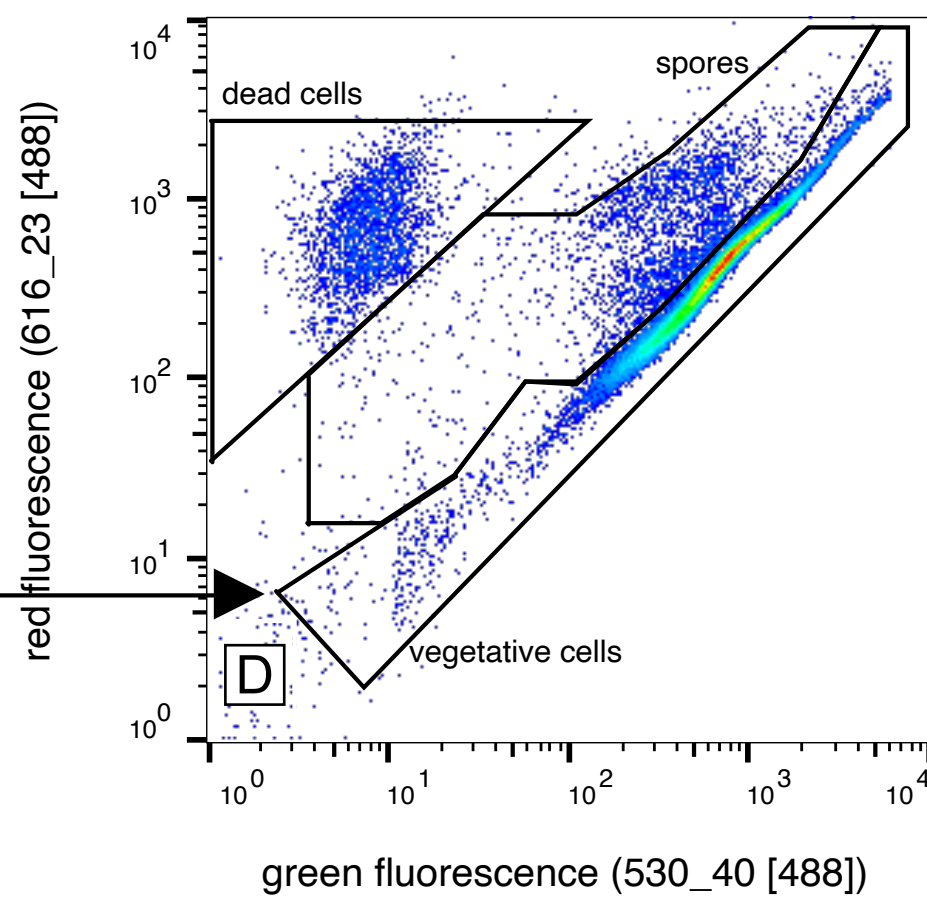

Supplement: d3sm01032e6.pdf [file d3sm01032e6.pdf]

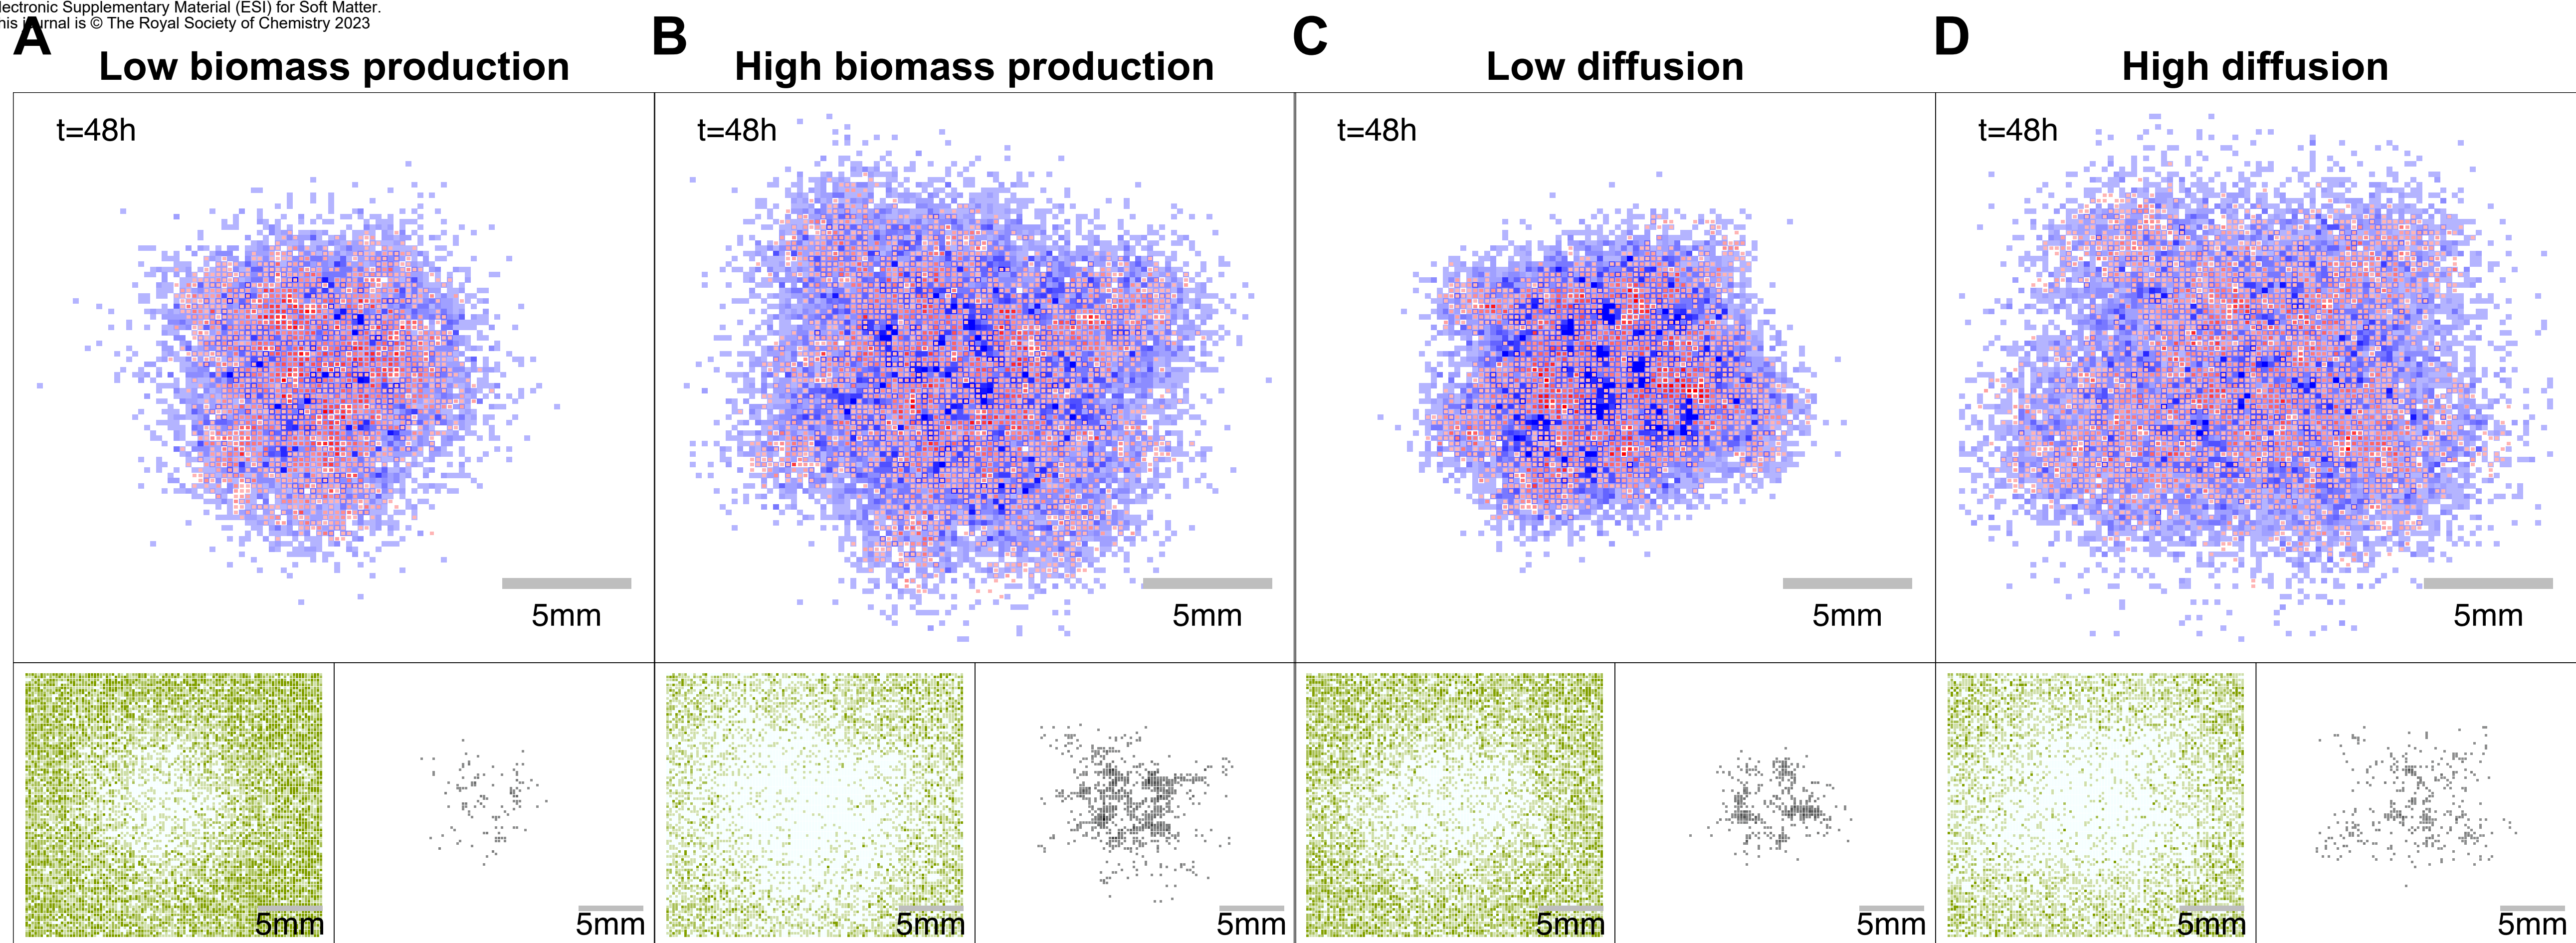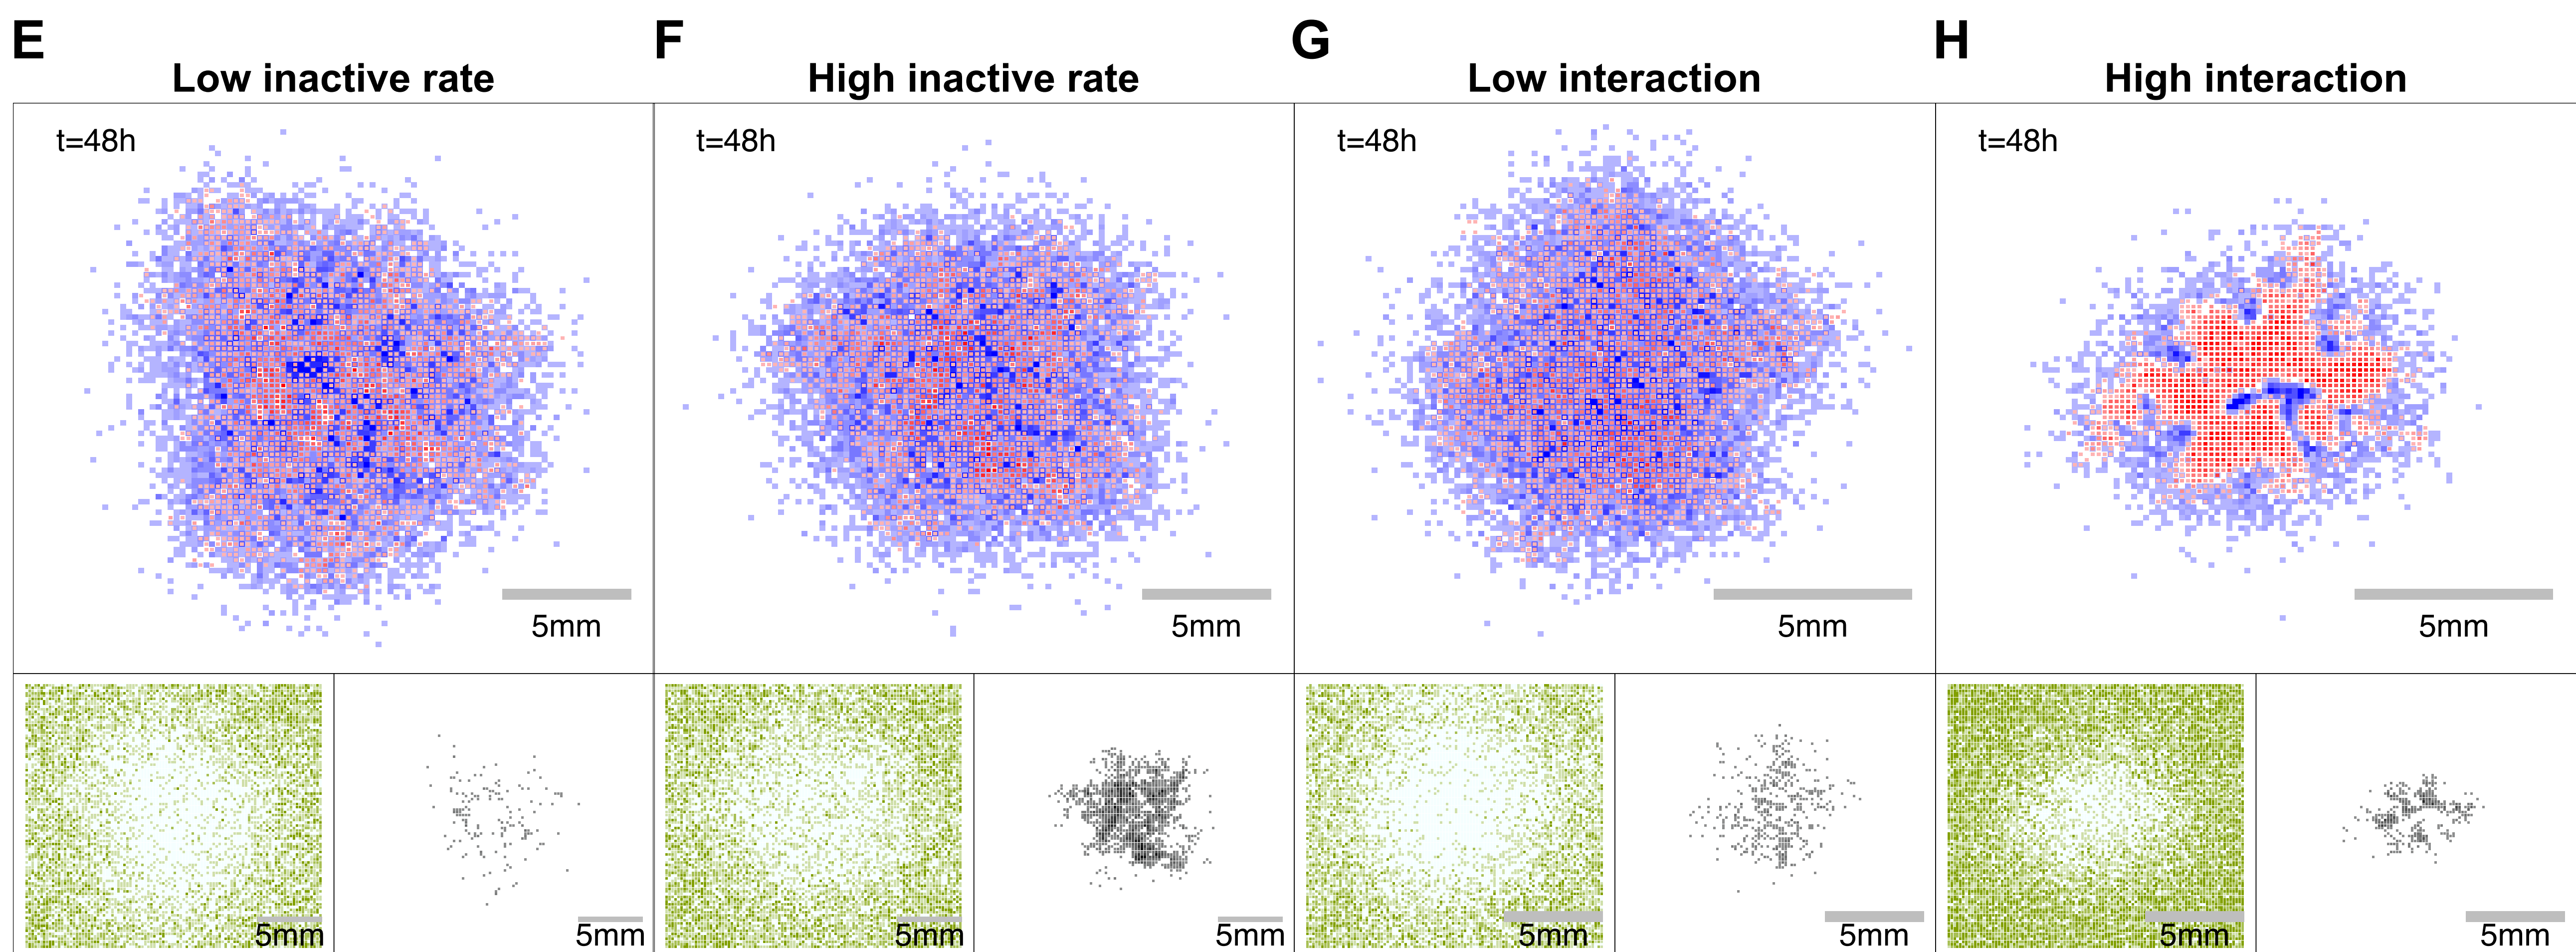

Supplement: d3sm01032e7.pdf [file d3sm01032e7.pdf]
